# Supplementary material for: Salts of (+)-deoxycholic acid with amines: structure, thermal stability, kinetics of salt formation, decomposition and chiral resolution
Source: Royal Society of Chemistry journal article supplement (doi:10.1039/c2ce26706c), 2012-12-11
Supplement: c2ce26706c.pdf [file c2ce26706c.pdf]

**Table 1 Hydrogen bond data for achiral salts**

| Compound                                                    | Donor (D) | Acceptor (A)      | D...A/Å  | D-H/Å    | H...A/Å  | D-H...A/° |
|-------------------------------------------------------------|-----------|-------------------|----------|----------|----------|-----------|
| <b>(H<sup>-</sup>)(PPA<sup>+</sup>)•ACE</b>                 | N1G       | O3 <sup>a</sup>   | 2.876(5) | 0.954    | 1.929    | 171       |
|                                                             | N1G       | O24A              | 3.293(4) | 0.897    | 2.634    | 131       |
|                                                             | N1G       | O24B <sup>b</sup> | 2.728(6) | 0.911    | 2.728    | 171       |
|                                                             | N1G       | O24B              | 2.762(3) | 0.897    | 1.869    | 174       |
|                                                             | O3        | O24A <sup>c</sup> | 2.627(2) | 0.840    | 1.797    | 170       |
| <b>(2H<sup>-</sup>)(2PPA<sup>+</sup>)•4.3H<sub>2</sub>O</b> | N1G       | O12A              | 2.834(3) | 0.81(4)  | 2.09(4)  | 153(3)    |
|                                                             | N1G       | O49 <sup>d</sup>  | 2.837(3) | 0.87(4)  | 1.98(4)  | 172(3)    |
|                                                             | O12B      | O43               | 2.732(3) | 0.85(4)  | 1.88(4)  | 174(4)    |
|                                                             | O12B      | O43A              | 2.67(1)  | 0.85(4)  | 1.94(4)  | 148(4)    |
|                                                             | O49       | O24C <sup>e</sup> | 2.753(3) | 0.81(2)  | 1.95(2)  | 172(4)    |
|                                                             | O49       | O12B              | 2.955(3) | 0.82(2)  | 2.20(3)  | 155(5)    |
|                                                             | O13       | O24D <sup>f</sup> | 2.667(3) | 0.87(5)  | 1.82(5)  | 163(5)    |
|                                                             | N1G       | O24B <sup>d</sup> | 2.743(3) | 0.897(2) | 1.846(4) | 178(3)    |
|                                                             | O57       | O3A               | 2.815(3) | 0.91(2)  | 1.91(2)  | 177(6)    |
|                                                             | O57       | O13 <sup>g</sup>  | 2.828(4) | 0.91(2)  | 1.97(3)  | 157(6)    |
|                                                             | O3A       | O24D <sup>h</sup> | 2.698(3) | 0.90(5)  | 1.81(5)  | 166(4)    |
|                                                             | N1GA      | O3B               | 2.84(2)  | 0.98(6)  | 1.86(5)  | 178(4)    |
|                                                             | N1GA      | O57               | 2.81(2)  | 0.89(5)  | 1.92(5)  | 171(5)    |
|                                                             | N1GB      | O57               | 2.77(3)  | 0.87(6)  | 1.92(5)  | 164(5)    |
|                                                             | N1GB      | O3B               | 2.76(4)  | 0.91(5)  | 1.86(5)  | 172(5)    |
|                                                             | O13       | O24B              | 2.774(3) | 0.91(6)  | 1.90(6)  | 161(5)    |
|                                                             | O12A      | O13 <sup>d</sup>  | 2.732(3) | 0.95(1)  | 1.79(1)  | 171(3)    |
|                                                             | N1GA      | O43               | 2.87(2)  | 0.99(8)  | 2.10(7)  | 133(5)    |
|                                                             | N1GA      | O24B <sup>d</sup> | 3.15(2)  | 0.99(8)  | 2.39(7)  | 134(5)    |
|                                                             | O3B       | O24A <sup>g</sup> | 2.692(3) | 0.94(2)  | 1.76(2)  | 170(4)    |
|                                                             | O43       | O24C <sup>e</sup> | 2.661(3) | 0.86(5)  | 1.88(5)  | 151(4)    |
|                                                             | O43       | O24A <sup>d</sup> | 2.693(4) | 0.84(6)  | 1.87(6)  | 168(5)    |
|                                                             | O43       | O24B <sup>d</sup> | 3.215(3) | 0.84(6)  | 2.64(6)  | 127(4)    |
| O5                                                          | O3A       | 2.96(1)           | 0.91(2)  | 2.05(4)  | 171(16)  |           |
| <b>(H<sup>-</sup>)(DBA<sup>+</sup>)</b>                     | N1G       | O24A              | 2.669(2) | 0.877    | 1.846    | 156       |
|                                                             | N1G       | O24B <sup>i</sup> | 2.708(2) | 0.926    | 1.785    | 174       |
|                                                             | O3        | O24A <sup>j</sup> | 2.850(2) | 0.969(2) | 2.025(2) | 142(1)    |

<sup>a</sup>: x, y, z-1

<sup>b</sup>: 2-x, y+1/2, -z

<sup>c</sup>: 2-x, y-1/2, 1-z

<sup>d</sup>: x, y+1, z

<sup>e</sup>: x, y-1, z

<sup>f</sup>: x, y-2, z

<sup>g</sup>: x-1, y+1, z

<sup>h</sup>: x-1, y-1, z

<sup>i</sup>: 1-x, y-1/2, 2-z

<sup>j</sup>: -x, y+1/2, 1-z

**Table 2 Hydrogen bond data for chiral salts**

| Compound                                  | Donor (D) | Acceptor (A)      | D...A/Å  | D-H/Å | H...A/Å | D-H...A/° |
|-------------------------------------------|-----------|-------------------|----------|-------|---------|-----------|
| <b>(H<sup>-</sup>)(R-BA<sup>+</sup>)</b>  | N1G       | O24A              | 2.752(3) | 0.910 | 1.845   | 174       |
|                                           | N1G       | O24A <sup>k</sup> | 2.785(3) | 0.910 | 1.882   | 172       |
|                                           | N1G       | O24B <sup>k</sup> | 3.261(3) | 0.910 | 2.579   | 132       |
|                                           | N1G       | O3 <sup>l</sup>   | 2.890(3) | 0.910 | 1.994   | 168       |
|                                           | O3        | O24B <sup>l</sup> | 2.636(2) | 0.820 | 1.839   | 164       |
| <b>(H<sup>-</sup>)(S-BA<sup>+</sup>)</b>  | N1G       | O24A <sup>m</sup> | 2.730(2) | 0.918 | 1.825   | 168       |
|                                           | N1G       | O24A <sup>n</sup> | 3.289(2) | 0.912 | 2.623   | 130       |
|                                           | N1G       | O24B <sup>n</sup> | 2.785(2) | 0.912 | 1.882   | 170       |
|                                           | N1G       | O3                | 2.821(2) | 0.866 | 1.973   | 166       |
|                                           | O3        | O24B <sup>o</sup> | 2.707(2) | 0.847 | 1.870   | 170       |
| <b>(H<sup>-</sup>)(R-MBA<sup>+</sup>)</b> | N1G       | O24A              | 2.990(4) | 0.910 | 2.184   | 147       |
|                                           | N1G       | O24A <sup>p</sup> | 2.738(4) | 0.910 | 1.872   | 158       |
|                                           | N1G       | O24B              | 2.999(4) | 0.910 | 2.159   | 153       |
|                                           | N1G       | O3 <sup>q</sup>   | 2.878(3) | 0.910 | 1.975   | 171       |
|                                           | O3        | O24B <sup>r</sup> | 2.678(3) | 0.840 | 1.843   | 173       |
| <b>(H<sup>-</sup>)(S-MBA<sup>+</sup>)</b> | N1G       | O24A <sup>o</sup> | 2.724(3) | 0.990 | 1.822   | 150       |
|                                           | N1G       | O24A              | 3.303(3) | 0.990 | 2.549   | 133       |
|                                           | N1G       | O24B              | 2.763(3) | 0.990 | 1.793   | 165       |
|                                           | N1G       | O3 <sup>n</sup>   | 2.831(3) | 0.837 | 2.058   | 153       |
|                                           | O3        | O24B <sup>s</sup> | 2.707(3) | 0.979 | 1.800   | 153       |

<sup>k</sup>: -x+1/2, y+1/2, -z-1

<sup>l</sup>: -x+1/2, y+1/2, -z

<sup>m</sup>: -x, y-1/2, 1-z

<sup>n</sup>: x, y, 1+z

<sup>o</sup>: -x, 1/2+y, 1-z

<sup>p</sup>: -x+1, y-1/2, -z

<sup>q</sup>: x-1, y, z-1

<sup>r</sup>: -x+2, y+1/2, -z+1

<sup>s</sup>: -x, y-1/2, -z
